# Supplementary material
Source: PubMed Central journal article supplement (PMC5008099)
Supplement: JVI.00483-16_zjv999181914so1.pdf [file JVI.00483-16_zjv999181914so1.pdf]

Table S1. D. novemcinctus Env protein coding sequences genomic coordinates

| Env coding gene  | Coordinates                                           |
|------------------|-------------------------------------------------------|
| <b>Env1-1(A)</b> | <b>Scaffold32544_302543_-_300786___REVERSE_SENSE_</b> |
| Env1-2 (A)       | Scaffold17879_53811_-_55391_                          |
| Env1-3 (A)       | Scaffold25043_61535_-_63220_                          |
| Env1-4 (A)       | Scaffold25561_1364243_-_1365925_                      |
| Env1-5 (A)       | Scaffold43375_42564_-_40912___REVERSE_SENSE_          |
| Env1-6 (A)       | Scaffold23524_4979734_-_4978424___REVERSE_SENSE_      |
| Env1-7 (B)       | Scaffold16087_980632_-_978941___REVERSE_SENSE_        |
| Env1-8 (B)       | 2 Scaffold25692_566144_-_567406_                      |
| <b>Env2-1</b>    | <b>Scaffold21203_490759_-_488996___REVERSE_SENSE_</b> |
| Env2-2           | Scaffold30563_2859315_-_2857555___REVERSE_SENSE_      |
| Env2-3           | Scaffold23585_312684_-_313994_                        |
| Env2-4           | Scaffold40803_163648_-_165132_                        |
| Env2-5           | Scaffold2929_366449_-_365076___REVERSE_SENSE_         |
| <b>Env3</b>      | <b>Scaffold31169_533253_-_531301___REVERSE_SENSE_</b> |
| <b>Env4-1</b>    | <b>Scaffold20048_7001716_-_7003749_</b>               |
| Env4-2           | Scaffold24522_1306278_-_1308311_                      |
| Env4-3           | Scaffold22404_293941_-_291908___REVERSE_SENSE_        |
| Env4-4           | Scaffold8917_19741_-_17708___REVERSE_SENSE_           |
| Env4-5           | Scaffold22309_139908_-_137875___REVERSE_SENSE_        |
| Env4-6           | Scaffold32119_195449_-_193725___REVERSE_SENSE_        |
| Env4-7           | Scaffold28974_106281_-_104248___REVERSE_SENSE_        |
| Env4-8           | Scaffold26794_35975_-_37576_                          |
| <b>Env5-1</b>    | <b>Scaffold23310_730384_-_731589_</b>                 |
| Env5-2           | Scaffold25508_11008_-_12273_                          |
| Env5-3           | Scaffold24216_214138_-_215370_                        |
| <b>Env6-1</b>    | <b>Scaffold22842_4617887_-_4619752_</b>               |
| Env6-2           | Scaffold25668_9322094_-_9323509_                      |
| Env6-3           | Scaffold23777_11035_-_9815___REVERSE_SENSE_           |
| Env6-4           | Scaffold45527_1274_-_2854_                            |
| Env6-5           | Scaffold19077_5823486_-_5825243_                      |
| Env6-6           | Scaffold25639_7570_-_8835_                            |
| <b>Env7-1</b>    | <b>Scaffold33345_390535_-_388637___REVERSE_SENSE_</b> |
| Env7-2           | Scaffold44858_106781_-_108412_                        |
| Env7-3           | Scaffold26099_8413767_-_8411647___REVERSE_SENSE_      |
| Env7-4           | Scaffold21652_6493112_-_6491754___REVERSE_SENSE_      |
| Env7-5           | Scaffold19077_5969547_-_5971133_                      |
| Env7-6           | Scaffold25186_24506_-_22284___REVERSE_SENSE_          |
| Env7-7           | Scaffold25742_359418_-_357871___REVERSE_SENSE_        |
| Env7-8           | Scaffold11116_647127_-_649145_                        |
| Env7-9           | Scaffold25668_179696_-_178305___REVERSE_SENSE_        |
| Env7-10          | Scaffold31910_2569972_-_2571411_                      |
| Env7-11          | Scaffold42701_196368_-_194557___REVERSE_SENSE_        |
| Env7-12          | Scaffold24026_411692_-_410232___REVERSE_SENSE_        |
| Env7-13          | Scaffold11631_479537_-_477666___REVERSE_SENSE_        |
| Env7-14          | Scaffold24761_160514_-_161809_                        |
| Env7-15          | Scaffold23416_15965_-_14613___REVERSE_SENSE_          |
| Env7-16          | Scaffold23769_48_-_1913_                              |
| Env7-17          | Scaffold8125_3290603_-_3289266___REVERSE_SENSE_       |
| Env7-18          | Scaffold23013_1188732_-_1190447_                      |

Env7-19 Scaffold29431\_1719625\_-1718321\_\_\_REVERSE\_SENSE\_  
**Env8-1 Scaffold44067\_981782\_-983191\_**  
 Env8-2 Scaffold507\_969775\_-971745\_  
 Env8-3 Scaffold31594\_1217832\_-1215808\_\_\_REVERSE\_SENSE\_  
 Env8-4 Scaffold25237\_633081\_-635051\_  
 Env8-5 Scaffold23243\_1555885\_-1557909\_  
 Env8-6 Scaffold32131\_50149\_-48077\_\_\_REVERSE\_SENSE\_  
 Env8-7 Scaffold24489\_38328\_-36775\_\_\_REVERSE\_SENSE\_  
 Env8-8 Scaffold26350\_299547\_-301523\_  
 Env8-9 Scaffold33970\_94200\_-96821\_  
 Env8-10 Scaffold19066\_180332\_-178827\_\_\_REVERSE\_SENSE\_  
 Env8-11 Scaffold24614\_2464295\_-2465647\_  
 Env8-12 Scaffold28080\_1346991\_-1348904\_  
 Env8-13 Scaffold25429\_7204\_-9276\_  
 Env8-14 Scaffold45030\_91818\_-90133\_\_\_REVERSE\_SENSE\_  
 Env8-15 Scaffold25056\_50037\_-48679\_\_\_REVERSE\_SENSE\_  
 Env8-16 Scaffold25552\_352487\_-353836\_  
 Env8-17 Scaffold37685\_610552\_-611988\_  
 Env8-18 Scaffold7450\_1207255\_-1204952\_\_\_REVERSE\_SENSE\_  
 Env8-19 Scaffold42989\_85756\_-87618\_  
 Env8-20 Scaffold37135\_816521\_-818365\_  
 Env8-21 Scaffold33599\_970948\_-969539\_\_\_REVERSE\_SENSE\_  
 Env8-22 Scaffold35708\_2502939\_-2504243\_  
 Env8-23 Scaffold18474\_3131608\_-3130346\_\_\_REVERSE\_SENSE\_  
 Env8-24 Scaffold45830\_151537\_-152850\_  
 Env8-25 Scaffold37922\_69932\_-68523\_\_\_REVERSE\_SENSE\_  
 Env8-26 Scaffold39750\_26356\_-27765\_  
 Env8-27 Scaffold22975\_87220\_-88626\_  
 Env8-28 Scaffold28399\_6380\_-5025\_\_\_REVERSE\_SENSE\_  
 Env8-29 Scaffold25075\_64795\_-66204\_  
 Env8-30 Scaffold43660\_43777\_-45186\_  
 Env8-31 Scaffold42911\_582759\_-580624\_\_\_REVERSE\_SENSE\_  
 Env8-32 Scaffold291\_2096620\_-2095373\_\_\_REVERSE\_SENSE\_  
 Env8-33 Scaffold24070\_44215\_-42812\_\_\_REVERSE\_SENSE\_  
 Env8-34 Scaffold23601\_49715\_-48309\_\_\_REVERSE\_SENSE\_  
 Env8-35 Scaffold31935\_222480\_-223889\_  
**Env9-1 Scaffold13387\_2177704\_-2175824\_\_\_REVERSE\_SENSE\_**  
 Env9-2 Scaffold21897\_214101\_-215573\_  
 Env9-3 Scaffold23423\_11387\_-9249\_\_\_REVERSE\_SENSE\_  
 Env9-4 Scaffold23952\_1086\_-3224\_  
 Env9-5 Scaffold27350\_4413112\_-4411757\_\_\_REVERSE\_SENSE\_  
 Env9-6 Scaffold20559\_414138\_-412783\_\_\_REVERSE\_SENSE\_  
 Env9-7 Scaffold8801\_302908\_-300770\_\_\_REVERSE\_SENSE\_  
 Env9-8 Scaffold24557\_574049\_-572370\_\_\_REVERSE\_SENSE\_  
 Env9-9 Scaffold30967\_410769\_-409414\_\_\_REVERSE\_SENSE\_  
 Env9-10 Scaffold10402\_2240841\_-2239345\_\_\_REVERSE\_SENSE\_  
 Env9-11 Scaffold24882\_11282\_-9885\_\_\_REVERSE\_SENSE\_  
 Env9-12 Scaffold24726\_1488\_-1\_\_\_REVERSE\_SENSE\_  
 Env9-13 Scaffold13771\_503217\_-501511\_\_\_REVERSE\_SENSE\_  
 Env9-14 Scaffold33380\_2253413\_-2255131\_  
 Env9-15 Scaffold24563\_1580250\_-1581596\_  
 Env9-16 Scaffold25129\_3016352\_-3018238\_  
 Env9-17 Scaffold23660\_19\_-1374\_

Env9-18 Scaffold39957\_1522451\_-\_1524448\_  
 Env9-19 Scaffold3606\_3575162\_-\_3576676\_  
 Env9-20 Scaffold13639\_121563\_-\_120217\_\_\_REVERSE\_SENSE\_  
 Env9-21 Scaffold32617\_227503\_-\_229008\_  
 Env9-22 Scaffold15688\_114531\_-\_112756\_\_\_REVERSE\_SENSE\_  
 Env9-23 Scaffold35827\_466494\_-\_468626\_  
 Env9-24 Scaffold40067\_660885\_-\_658753\_\_\_REVERSE\_SENSE\_  
 Env9-25 Scaffold870\_34825\_-\_33320\_\_\_REVERSE\_SENSE\_  
 Env9-26 Scaffold33465\_1143357\_-\_1145489\_  
 Env9-27 Scaffold27840\_200369\_-\_198381\_\_\_REVERSE\_SENSE\_  
 Env9-28 Scaffold10019\_111252\_-\_110029\_\_\_REVERSE\_SENSE\_  
 Env9-29 Scaffold12738\_879136\_-\_880341\_  
 Env9-30 Scaffold20305\_1841479\_-\_1842843\_  
**Env10-1 Scaffold22674\_623444\_-\_621531\_\_\_REVERSE\_SENSE\_**  
 Env10-2 Scaffold31668\_5286583\_-\_5288130\_  
 Env10-3 Scaffold38157\_1008831\_-\_1006075\_\_\_REVERSE\_SENSE\_  
 Env10-4 Scaffold8602\_232541\_-\_233890\_  
 Env10-5 Scaffold25203\_1439094\_-\_1441571\_  
 Env10-6 Scaffold37138\_174238\_-\_176361\_  
 Env10-7 Scaffold44903\_434919\_-\_436973\_  
 Env10-8 Scaffold34273\_5376163\_-\_5374073\_\_\_REVERSE\_SENSE\_  
 Env10-9 Scaffold24456\_232242\_-\_234110\_  
 Env10-10 Scaffold27165\_68203\_-\_70053\_  
 Env10-11 Scaffold19239\_3891\_-\_5240\_  
 Env10-12 Scaffold37051\_337853\_-\_336534\_\_\_REVERSE\_SENSE\_  
 Env10-13 Scaffold26789\_1995394\_-\_1997286\_  
 Env10-14 Scaffold22542\_1385404\_-\_1387308\_  
 Env10-15 Scaffold41987\_14879\_-\_10512\_\_\_REVERSE\_SENSE\_  
 Env10-16 Scaffold33709\_15542\_-\_17392\_  
 Env10-17 Scaffold12291\_692162\_-\_690468\_\_\_REVERSE\_SENSE\_  
 Env10-18 Scaffold27649\_452615\_-\_453838\_  
**Env11-1 Scaffold24459\_447683\_-\_445842\_\_\_REVERSE\_SENSE\_**  
 Env11-2 Scaffold32111\_528742\_-\_527534\_\_\_REVERSE\_SENSE\_  
 Env11-3 Scaffold24215\_259358\_-\_260797\_  
 Env11-4 Scaffold44762\_623899\_-\_625734\_  
 Env11-5 Scaffold27672\_660609\_-\_659389\_\_\_REVERSE\_SENSE\_  
 Env11-6 Scaffold22703\_141176\_-\_143011\_  
 Env11-7 Scaffold24459\_447683\_-\_445842\_\_\_REVERSE\_SENSE\_  
 Env11-8 Scaffold32111\_528742\_-\_527534\_\_\_REVERSE\_SENSE\_  
 Env11-9 Scaffold28459\_39603\_-\_41042\_  
 Env11-10 Scaffold22703\_141176\_-\_143011\_  
 Env11-11 Scaffold42408\_2113527\_-\_2112088\_\_\_REVERSE\_SENSE\_  
 Env11-12 Scaffold3701\_23381\_-\_24817\_  
 Env11-13 Scaffold13872\_1810073\_-\_1811695\_  
 Env11-14 Scaffold900\_223333\_-\_221984\_\_\_REVERSE\_SENSE\_  
**Env12-1 Scaffold25626\_838687\_-\_837236\_\_\_REVERSE\_SENSE\_**  
 Env12-2 Scaffold25314\_3805824\_-\_3804385\_\_\_REVERSE\_SENSE\_  
 Env12-3 Scaffold23455\_366787\_-\_365480\_\_\_REVERSE\_SENSE\_  
 Env12-4 Scaffold42257\_175299\_-\_176717\_  
 Env12-5 Scaffold4265\_2067282\_-\_2066023\_\_\_REVERSE\_SENSE\_  
 Env12-6 Scaffold25220\_345082\_-\_346344\_  
**Env13-1 Scaffold38741\_38875\_-\_40635\_**  
 Env13-2 Scaffold31390\_506274\_-\_504994\_\_\_REVERSE\_SENSE\_

|                |                                                        |
|----------------|--------------------------------------------------------|
| Env13-3        | Scaffold24392_849410_-_850939_                         |
| <b>Env14-1</b> | <b>Scaffold37559_475553_-_473565____REVERSE_SENSE_</b> |
| Env14-2        | Scaffold34310_4803_-_6785_                             |
| Env14-3        | Scaffold25329_34757_-_36481_                           |
| Env14-4        | Scaffold24860_85000_-_83657____REVERSE_SENSE_          |
| Env14-5        | Scaffold31354_18584_-_20077_                           |
| Env14-6        | Scaffold25668_7010694_-_7012325_                       |

---

Scaffold number, coordinates and strand orientation are given according to the reference armadillo genome (DasNov3.0) from the Baylor College of Medicine genome database (<http://www.ncbi.nlm.nih.gov/genome/235>). Sequences in bold are representative Env candidates whose hydrophobicity plot is shown in Figure 1C. Env1 sequences targeted with primer pairs Dasy-env1A or -1B (see Fig. 2) are indicated with (A) or (B) respectively.
